# Supplementary material for: Revisiting the immunopathology of congenital disorders of glycosylation: an updated review
Source: Front Immunol. 2024 Mar 14;15:1350101. doi: 10.3389/fimmu.2024.1350101 (PMC10972870; doi:10.3389/fimmu.2024.1350101)
Supplement: Supplementary file 1 [file DataSheet_1.xlsx]

## Sheet: Search Methodology
Keywords	"CDG Ia", "PMM2-CDG", "PMM2"
Search engine	PubMed
Database	MEDLINE
Search Script	https://github.com/tatianarijoff/tj_articles

## Sheet: Data Collection Methodology
Inclusion criteria	Articles with new clinical reports of the specified CDG (wether its new patients or new immune issues)
	Reviews are only added if they report new patients
Exclusion criteria	Articles not in english
	basic reseach or other articles that do not report clinical observations. However, if you think those article have insights to the molecular mechanisms/discussion , you can highlight them for the future.
Data Collection guide	For the information extraction, please include:
	Infection-related information (e.g. local infections (e.g. Omphalitiscelulitis)/ or general infections (sepsis); recurrent/isolated; microorganisms
	Inflammation related information (e.g., local inflammation (e.g., balinitis, bronchitis)/ high CRP
	Auto-immune parameters or syndromes (e.g. autoantibodies, Guillain-Barre syndrome)
	Cellular and functional information (cellular counts; proliferation, cytotoxity etc)
	Biochemical information (e.g. Ig levels, affinity and glycosylation)
	Vaccination related information (e.g. absent responses, low titers, lost of protection...)

## Sheet: Article Selection
id	orig	to_be_included	year	first_author	title	journal	Reason for exclusion
1081856	Pubmed	FALSE	1975	Schmitz-Valckenberg	[Tension under controlled conditions in the encircling operation (author's transl)].	Albrecht von Graefes Archiv fur klinische und experimentelle Ophthalmologie. Albrecht von Graefe's archive for clinical and experimental ophthalmology	Not in English
269798	Pubmed	FALSE	1977	Bunte	[Comparative studies on the adhesiveness to the bone of various implantation materials].	Deutsche zahnarztliche Zeitschrift	Not in English
308450	Pubmed	FALSE	1978	Winklmair	[Gingival bleeding test with a new tonometer and testing of a chlorhexidine containing dentifrice].	Deutsche zahnarztliche Zeitschrift	Not in English
6195937	Pubmed	FALSE	1983	Debruyne	Staining of alkali-labile phosphoproteins and alkaline phosphatases on polyacrylamide gels.	Analytical biochemistry	Not PMM2 related!
2603832	Pubmed	FALSE	1989	Stoll	[An instrument for measuring skinfold thickness. A short report].	Arztliche Jugendkunde	Not in English
20301507	Pubmed	FALSE	1993	Adam	Congenital Disorders of N-Linked Glycosylation and Multiple Pathway Overview		Review
20301289	Pubmed	FALSE	1993	Adam	PMM2-CDG		Review
8236783	Pubmed	FALSE	1993	Zhao	Detection of Mycoplasma meleagridis by polymerase chain reaction.	Veterinary microbiology	Not PMM2 related!
8362495	Pubmed	FALSE	1993	Zhao	Species-specific recombinant DNA probes for Mycoplasma meleagridis.	Veterinary microbiology	Not PMM2 related!
8366655	Pubmed	FALSE	1993	Rajecka	[Change of right ventricle performance caused by intravenous nitroglycerin infusion in patients with isolated mitral stenosis].	Kardiologia polska	Not in English
9140401	Pubmed	FALSE	1997	Matthijs	Mutations in PMM2, a phosphomannomutase gene on chromosome 16p13, in carbohydrate-deficient glycoprotein type I syndrome (Jaeken syndrome).	Nature genetics	Genetic analysis
9425221	Pubmed	FALSE	1998	Schollen	Comparative analysis of the phosphomannomutase genes PMM1, PMM2 and PMM2psi: the sequence variation in the processed pseudogene is a reflection of the mutations found in the functional gene.	Human molecular genetics	Basic Research
9497260	Pubmed	FALSE	1998	Matthijs	Lack of homozygotes for the most frequent disease allele in carbohydrate-deficient glycoprotein syndrome type 1A.	American journal of human genetics	No immune involvement
9781052	Pubmed	FALSE	1998	Matthijs	Prenatal diagnosis in CDG1 families: beware of heterogeneity.	European journal of human genetics : EJHG	Prenatal screening
9887379	Pubmed	FALSE	1998	Bjursell	Detailed mapping of the phosphomannomutase 2 (PMM2) gene and mutation detection enable improved analysis for Scandinavian CDG type I families.	European journal of human genetics : EJHG	Prenatal screening
9781039	Pubmed	FALSE	1998	Kjaergaard	Absence of homozygosity for predominant mutations in PMM2 in Danish patients with carbohydrate-deficient glycoprotein syndrome type 1.	European journal of human genetics : EJHG	No immune involvement
10085245	Pubmed	FALSE	1999	Pirard	Kinetic properties and tissular distribution of mammalian phosphomannomutase isozymes.	The Biochemical journal	Rat tissues
10392743	Pubmed	FALSE	1999	Mizugishi	Missense mutations in the phosphomannomutase 2 gene of two Japanese siblings with carbohydrate-deficient glycoprotein syndrome type I.	Brain & development	No immune involvement
10495932	Pubmed	FALSE	1999	Crosby	Prenatal diagnosis and the subsequent mutation analysis in a family with carbohydrate-deficient glycoprotein type I syndrome: growing evidence to support founder effects within CDG1 populations.	Genetic testing	No immune involvement
10429369	Pubmed	FALSE	1999	Mizugishi	An AciI polymorphism in the 3' untranslated region of the human phosphomannomutase 2 (PMM2) gene.	Journal of human genetics	Polymorfism report
10571956	Pubmed	FALSE	1999	Vuillaumier-Barrot	Characterization of the 415G>A (E139K) PMM2 mutation in carbohydrate-deficient glycoprotein syndrome type Ia disrupting a splicing enhancer resulting in exon 5 skipping.	Human mutation	No immune involvement
10066032	Pubmed	FALSE	1999	Kondo	Missense mutations in phosphomannomutase 2 gene in two Japanese families with carbohydrate-deficient glycoprotein syndrome type 1.	Clinical genetics	No immune involvement
10602363	Pubmed	FALSE	1999	Kjaergaard	Carbohydrate-deficient glycoprotein syndrome type 1A: expression and characterisation of wild type and mutant PMM2 in E. coli.	European journal of human genetics : EJHG	No immune involvement
10832578	Pubmed	FALSE	2000	Hanefeld	Congenital disorder of glycosylation-Ic: case report and genetic defect.	Neuropediatrics	not PMM2-CDG
10801058	Pubmed	FALSE	2000	Imtiaz	Genotypes and phenotypes of patients in the UK with carbohydrate-deficient glycoprotein syndrome type 1.	Journal of inherited metabolic disease	No immune involvement
10852543	Pubmed	FALSE	2000	Grünewald	Clinical and biochemical characteristics of congenital disorder of glycosylation type Ic, the first recognized endoplasmic reticulum defect in N-glycan synthesis.	Annals of neurology	not PMM2-CDG
10790224	Pubmed	FALSE	2000	Vuillaumier-Barrot	Identification of a IVS4-58delATG polymorphism in the human phosphomannomutase 2 (PMM2) gene.	Human mutation	No immune involvement
10922383	Pubmed	FALSE	2000	Vuillaumier-Barrot	Identification of four novel PMM2 mutations in congenital disorders of glycosylation (CDG) Ia French patients.	Journal of medical genetics	No immune involvement
11142762	Pubmed	FALSE	2000	Erlandson	Denaturing high-performance liquid chromatography is a suitable method for PMM2 mutation screening in carbohydrate-deficient glycoprotein syndrome type IA patients.	Genetic testing	No immune involvement
11058895	Pubmed	FALSE	2000	Matthijs	Mutations in PMM2 that cause congenital disorders of glycosylation, type Ia (CDG-Ia).	Human mutation	Mutations update
10700701	Pubmed	FALSE	2000	van Ommen	Carbohydrate-deficient glycoprotein syndrome type 1a: a variant phenotype with borderline cognitive dysfunction, cerebellar hypoplasia, and coagulation disturbances.	The Journal of pediatrics	No immune involvement
11058896	Pubmed	FALSE	2000	Bjursell	PMM2 mutation spectrum, including 10 novel mutations, in a large CDG type 1A family material with a focus on Scandinavian families.	Human mutation	Mutation screening
11140630	Pubmed	FALSE	2000	Colomé	Personal experience with the application of carbohydrate-deficient transferrin (CDT) assays to the detection of congenital disorders of glycosylation.	Clinical chemistry and laboratory medicine	Screening
11159919	Pubmed	FALSE	2000	Dupré	Defect in N-glycosylation of proteins is tissue-dependent in congenital disorders of glycosylation Ia.	Glycobiology	Basic Research
10854097	Pubmed	FALSE	2000	Schollen	Lack of Hardy-Weinberg equilibrium for the most prevalent PMM2 mutation in CDG-Ia (congenital disorders of glycosylation type Ia).	European journal of human genetics : EJHG	Basic Research
11409861	Pubmed	FALSE	2001	Erlandson	Scandinavian CDG-Ia patients: genotype/phenotype correlation and geographic origin of founder mutations.	Human genetics	No immune involvement
11916319	Pubmed	FALSE	2001	Böhles	Hyperinsulinaemic hypoglycaemia--leading symptom in a patient with congenital disorder of glycosylation Ia (phosphomannomutase deficiency).	Journal of inherited metabolic disease	No immune involvement
11596651	Pubmed	FALSE	2001	Van Geet	Congenital disorders of glycosylation type Ia and IIa are associated with different primary haemostatic complications.	Journal of inherited metabolic disease	No immune involvement
11589167	Pubmed	FALSE	2001	Briones	Congenital disorders of glycosylation (CDG) may be underdiagnosed when mimicking mitochondrial disease.	European journal of paediatric neurology : EJPN : official journal of the European Paediatric Neurology Society	No immune involvement
11404002	Pubmed	FALSE	2001	Heykants	Identification and localization of two mouse phosphomannomutase genes, Pmm1 and Pmm2.	Gene	Basic Research
11156536	Pubmed	FALSE	2001	Grünewald	High residual activity of PMM2 in patients' fibroblasts: possible pitfall in the diagnosis of CDG-Ia (phosphomannomutase deficiency).	Electronic-Database Information	No immune involvement
11343337	Pubmed	FALSE	2001	Drouin-Garraud	Neurological presentation of a congenital disorder of glycosylation CDG-Ia: implications for diagnosis and genetic counseling.	American journal of medical genetics	No immune involvement
11461567	Pubmed	FALSE	2001	Catti	Orthorhombic intermediate state in the zinc blende to rocksalt transformation path of SiC at high pressure.	Physical review letters	Not PMM2-related
11680873	Pubmed	FALSE	2001	Zdebska	Band 3 glycoprotein and glycophorin A from erythrocytes of children with congenital disorder of glycosylation type-Ia are underglycosylated.	Proteomics	No immune involvement
11530212	Pubmed	FALSE	2001	Freeze	Balancing N-linked glycosylation to avoid disease.	Biochimie	REVIEW
11715002	Pubmed	FALSE	2001	Westphal	Functional significance of PMM2 mutations in mildly affected patients with congenital disorders of glycosylation Ia.	Genetics in medicine : official journal of the American College of Medical Genetics	No immune involvement
11134235	Pubmed	TRUE	2001	de Lonlay	A broad spectrum of clinical presentations in congenital disorders of glycosylation I: a series of 26 cases.	Journal of medical genetics
11517108	Pubmed	TRUE	2001	Kjaergaard	Congenital disorder of glycosylation type Ia (CDG-Ia): phenotypic spectrum of the R141H/F119L genotype.	Archives of disease in childhood
11350185	Pubmed	FALSE	2001	Westphal	Functional analysis of novel mutations in a congenital disorder of glycosylation Ia patient with mixed Asian ancestry.	Molecular genetics and metabolism	No immune involvement
11427453	Pubmed	FALSE	2001	Helander	Interference of transferrin isoform types with carbohydrate-deficient transferrin quantification in the identification of alcohol abuse.	Clinical chemistry	No immune involvement
11311246	Pubmed	TRUE	2001	Van Dijk	Increased alpha3-fucosylation of alpha(1)-acid glycoprotein in patients with congenital disorder of glycosylation type IA (CDG-Ia).	FEBS letters
12398227	Pubmed	FALSE	2002	Laml	Genetic disorders in premature ovarian failure.	Human reproduction update	REVIEW
12409504	Pubmed	FALSE	2002	Grunewald	Congenital disorders of glycosylation: a review.	Pediatric research	REVIEW
12409508	Pubmed	FALSE	2002	Sala	Increased biosynthesis of glycosphingolipids in congenital disorder of glycosylation Ia (CDG-Ia) fibroblasts.	Pediatric research	Basic Research
12434892	Pubmed	FALSE	2002	Harms	Oral mannose therapy persistently corrects the severe clinical symptoms and biochemical abnormalities of phosphomannose isomerase deficiency.	Acta paediatrica (Oslo, Norway : 1992)	Not PMM2-related
12413857	Pubmed	FALSE	2002	Rutschow	Membrane-permeant derivatives of mannose-1-phosphate.	Bioorganic & medicinal chemistry	Basic Research
11891694	Pubmed	FALSE	2002	Tayebi	A deletion-insertion mutation in the phosphomannomutase 2 gene in an African American patient with congenital disorders of glycosylation-Ia.	American journal of medical genetics	No immune involvement
12705494	Pubmed	FALSE	2002	Briones	Biochemical and molecular studies in 26 Spanish patients with congenital disorder of glycosylation type Ia.	Journal of inherited metabolic disease	No immune involvement
12357336	Pubmed	FALSE	2002	Schollen	DHPLC analysis as a platform for molecular diagnosis of congenital disorders of glycosylation (CDG).	European journal of human genetics : EJHG	No immune involvement
12244009	Pubmed	FALSE	2002	Kjaergaard	Prepubertal growth in congenital disorder of glycosylation type Ia (CDG-Ia).	Archives of disease in childhood	No immune involvement
12013150	Pubmed	FALSE	2002	Barone	Assessment of skeletal status in patients with congenital disorder of glycosylation type IA.	International journal of tissue reactions	No immune involvement
12297897	Pubmed	TRUE	2002	Marquardt	Severe transient myocardial ischaemia caused by hypertrophic cardiomyopathy in a patient with congenital disorder of glycosylation type Ia.	European journal of pediatrics
11875054	Pubmed	FALSE	2002	Westphal	A frequent mild mutation in ALG6 may exacerbate the clinical severity of patients with congenital disorder of glycosylation Ia (CDG-Ia) caused by phosphomannomutase deficiency.	Human molecular genetics	No immune involvement
12410200	Pubmed	FALSE	2002	Enns	Clinical and molecular features of congenital disorder of glycosylation in patients with type 1 sialotransferrin pattern and diverse ethnic origins.	The Journal of pediatrics	No immune involvement
12920791	Pubmed	FALSE	2003	Honzík	[Congenital disorder of type Ia protein glycosylation: clinical, biochemical and molecular characteristics in 2 siblings with cerebellar hypoplasia].	Casopis lekaru ceskych	Not in English
12729595	Pubmed	FALSE	2003	Orvisky	Phosphomannomutase activity in congenital disorders of glycosylation type Ia determined by direct analysis of the interconversion of mannose-1-phosphate to mannose-6-phosphate by high-pH anion-exchange chromatography with pulsed amperometric detection.	Analytical biochemistry	Cell culture
12763243	Pubmed	FALSE	2003	Artuch	Western blotting with diaminobenzidine detection for the diagnosis of congenital disorders of glycosylation.	Journal of neuroscience methods	Basic Research
12690561	Pubmed	TRUE	2003	Miossec-Chauvet	Neurological presentation in pediatric patients with congenital disorders of glycosylation type Ia.	Neuropediatrics
12889654	Pubmed	FALSE	2003	Jaeken	Komrower Lecture. Congenital disorders of glycosylation (CDG): it's all in it!	Journal of inherited metabolic disease	REVIEW
12789572	Pubmed	FALSE	2003	Jensen	Ophthalmic manifestations of congenital disorder of glycosylation type 1a.	Ophthalmic genetics	No immune involvement
12626389	Pubmed	FALSE	2003	Callewaert	Increased fucosylation and reduced branching of serum glycoprotein N-glycans in all known subtypes of congenital disorder of glycosylation I.	Glycobiology	No immune involvement
14708882	Pubmed	FALSE	2003	Kleinert	Mass spectrometric analysis of human transferrin in different body fluids.	Clinical chemistry and laboratory medicine	Basic Research
13129599	Pubmed	FALSE	2003	Ono	Novel nonsense mutation (R194X) in the PMM2 gene in a Japanese patient with congenital disorder of glycosylation type Ia.	Brain & development	No immune involvement
12905014	Pubmed	TRUE	2003	Neumann	Congenital disorder of glycosylation type 1a in a macrosomic 16-month-old boy with an atypical phenotype and homozygosity of the N216I mutation.	European journal of pediatrics
12907065	Pubmed	FALSE	2003	Zentilin Boyer	[Failure to thrive and intestinal diseases in congenital disorders of glycosylation].	Archives de pediatrie : organe officiel de la Societe francaise de pediatrie	Not in English
13130291	Pubmed	FALSE	2003	Durand	[Congenital disorders of glycosylation].	Annales pharmaceutiques francaises	Not in English
15520415	Pubmed	TRUE	2004	Schollen	Increased recurrence risk in congenital disorders of glycosylation type Ia (CDG-Ia) due to a transmission ratio distortion.	Journal of medical genetics
15313000	Pubmed	FALSE	2004	Qiang	Poly(methylidene malonate 2.1.2) nanoparticles: a biocompatible polymer that enhances peri-adventitial adenoviral gene delivery.	Journal of controlled release : official journal of the Controlled Release Society	Not about PMM2-CDG
15669673	Pubmed	FALSE	2004	Fang	Improvement of CDG diagnosis by combined examination of several glycoproteins.	Journal of inherited metabolic disease	No immune involvement
15361947	Pubmed	FALSE	2004	Chu	Carbohydrate deficient glycoprotein syndrome type Ia.	Journal of the Formosan Medical Association = Taiwan yi zhi	No access
15076627	Pubmed	FALSE	2004	Damen	Gastrointestinal and other clinical manifestations in 17 children with congenital disorders of glycosylation type Ia, Ib, and Ic.	Journal of pediatric gastroenterology and nutrition	No immune involvement
15171833	Pubmed	FALSE	2004	Vilaseca	[Congenital disorders of glycosylation: state of the art and Spanish experience].	Medicina clinica	Not in English
16079417	Pubmed	FALSE	2005	Eklund	Hydrophobic Man-1-P derivatives correct abnormal glycosylation in Type I congenital disorder of glycosylation fibroblasts.	Glycobiology	Basic Research
15708848	Pubmed	FALSE	2005	Gao	Analysis of glycosylation in CDG-Ia fibroblasts by fluorophore-assisted carbohydrate electrophoresis: implications for extracellular glucose and intracellular mannose 6-phosphate.	The Journal of biological chemistry	Basic Research
16435227	Pubmed	FALSE	2005	Coman	Congenital disorder of glycosylation type Ia in a 6-year-old girl with a mild intellectual phenotype: two novel PMM2 mutations.	Journal of inherited metabolic disease	Without immunological involvement
16115222	Pubmed	FALSE	2005	Cromphout	Tissue distribution of the murine phosphomannomutases Pmm1 and Pmm2 during brain development.	The European journal of neuroscience	Mouse model
16435229	Pubmed	FALSE	2005	Jackson	Elevation of plasma aspartylglucosaminidase is a useful marker for the congenital disorders of glycosylation type I (CDG I).	Journal of inherited metabolic disease	Without immunological involvement
16085795	Pubmed	FALSE	2005	Lavieu	Defect of N-glycosylation is not directly related to congenital disorder of glycosylation Ia fibroblast sensitivity to staurosporine-induced cell death.	Pediatric research	Basic Research
15645285	Pubmed	TRUE	2005	Noelle	Unusual presentation of congenital disorder of glycosylation type 1a: congenital persistent thrombocytopenia, hypertrophic cardiomyopathy and hydrops-like aspect due to marked peripheral oedema.	European journal of pediatrics
15844218	Pubmed	FALSE	2005	Le Bizec	A new insight into PMM2 mutations in the French population.	Human mutation	Not new cases
15714316	Pubmed	TRUE	2005	Aronica	Congenital disorder of glycosylation type Ia: a clinicopathological report of a newborn infant with cerebellar pathology.	Acta neuropathologica
15342340	Pubmed	FALSE	2005	Menniti	Serum and glucocorticoid-regulated kinase Sgk1 inhibits insulin-dependent activation of phosphomannomutase 2 in transfected COS-7 cells.	American journal of physiology. Cell physiology	Basic Research
15771971	Pubmed	FALSE	2005	Vuillaumier-Barrot	[Molecular diagnosis of congenital disorders of glycosylation].	Annales de biologie clinique	Not in English
16343971	Pubmed	FALSE	2006	Nogueira	Prenatal diagnosis for CDG Ia based on post-mortem molecular study of Guthrie card.	Molecular genetics and metabolism	Letter to the editor
16963079	Pubmed	FALSE	2006	Kedzierski	Structure of Leishmania mexicana phosphomannomutase highlights similarities with human isoforms.	Journal of molecular biology	Basic Research
16847317	Pubmed	FALSE	2006	Thiel	Targeted disruption of the mouse phosphomannomutase 2 gene causes early embryonic lethality.	Molecular and cellular biology	Basic Research
16824708	Pubmed	FALSE	2006	Felt-Baeyens	Biodegradable scleral implants as new triamcinolone acetonide delivery systems.	International journal of pharmaceutics	Not about PMM2-CDG
16423609	Pubmed	FALSE	2006	Schade van Westrum	Skeletal dysplasia and myelopathy in congenital disorder of glycosylation type IA.	The Journal of pediatrics	Without immunological involvement
16554263	Pubmed	FALSE	2006	Eklund	The congenital disorders of glycosylation: a multifaceted group of syndromes.	NeuroRx : the journal of the American Society for Experimental NeuroTherapeutics	REVIEW
16376131	Pubmed	FALSE	2006	Vuillaumier-Barrot	PMM2 intronic branch-site mutations in CDG-Ia.	Molecular genetics and metabolism	Without immunological involvement
16540464	Pubmed	FALSE	2006	Silvaggi	The X-ray crystal structures of human alpha-phosphomannomutase 1 reveal the structural basis of congenital disorder of glycosylation type 1a.	The Journal of biological chemistry	Basic Research
16439595	Pubmed	FALSE	2006	Mandato	Cryptogenic liver disease in four children: a novel congenital disorder of glycosylation.	Pediatric research	Not about PMM2-CDG
16552784	Pubmed	FALSE	2006	Mills	Diagnosis of congenital disorders of glycosylation type-I using protein chip technology.	Proteomics	Basic Research
16826448	Pubmed	TRUE	2006	Blank	Recurrent infections and immunological dysfunction in congenital disorder of glycosylation Ia (CDG Ia).	Journal of inherited metabolic disease
16328327	Pubmed	FALSE	2006	Hertz-Pannier	Congenital disorders of glycosylation type I: a rare but new cause of hyperechoic kidneys in infants and children due to early microcystic changes.	Pediatric radiology	Without immunological involvement
16915591	Pubmed	FALSE	2006	Edwards	Prenatal diagnosis of congenital disorder of glycosylation type Ia (CDG-Ia) by cordocentesis and transferrin isoelectric focussing of serum of a 27-week fetus with non-immune hydrops.	Prenatal diagnosis	Without immunological involvement
16847318	Pubmed	FALSE	2006	Cromphout	The normal phenotype of Pmm1-deficient mice suggests that Pmm1 is not essential for normal mouse development.	Molecular and cellular biology	Mouse model
16775797	Pubmed	FALSE	2006	Pascual-Castroviejo	[Cerebellar ataxia of Norman-Jaeken. Presentation of seven Spanish patients].	Revista de neurologia	Not in English
17920054	Pubmed	FALSE	2007	Biffi	Carbohydrate-deficient transferrin (CDT) as a biochemical tool for the screening of congenital disorders of glycosylation (CDGs).	Clinical biochemistry	Without immunological involvement
18034167	Pubmed	FALSE	2007	Wurm	Congenital disorders of glycosylation type Ia as a cause of mirror syndrome.	Journal of perinatology : official journal of the California Perinatal Association	Without immunological involvement
17186415	Pubmed	TRUE	2007	Barone	Borderline mental development in a congenital disorder of glycosylation (CDG) type Ia patient with multisystemic involvement (intermediate phenotype).	Journal of inherited metabolic disease
17307006	Pubmed	FALSE	2007	Schollen	Characterization of two unusual truncating PMM2 mutations in two CDG-Ia patients.	Molecular genetics and metabolism	Without immunological involvement
18428410	Pubmed	FALSE	2007	O'Brien	Detection of hypo-N-glycosylation using mass spectrometry of transferrin.	Current protocols in human genetics	Protocol
17663480	Pubmed	FALSE	2007	McKenzie	A previously undescribed form of congenital disorder of glycosylation with variable presentation in siblings: early fetal loss with hydrops fetalis, and infant death with hypoproteinemia.	American journal of medical genetics. Part A	Not about PMM2-CDG
17716641	Pubmed	FALSE	2007	Marklová	Screening and diagnosis of congenital disorders of glycosylation.	Clinica chimica acta; international journal of clinical chemistry	Invited critical review
17694350	Pubmed	FALSE	2007	Vermeer	Cerebellar ataxia and congenital disorder of glycosylation Ia (CDG-Ia) with normal routine CDG screening.	Journal of neurology	Without immunological involvement
17049852	Pubmed	FALSE	2007	Hardré	Mono, di and tri-mannopyranosyl phosphates as mannose-1-phosphate prodrugs for potential CDG-Ia therapy.	Bioorganic & medicinal chemistry letters	Basic Research
17963418	Pubmed	FALSE	2007	Babovic-Vuksanovic	Laboratory diagnosis of congenital disorders of glycosylation type I by analysis of transferrin glycoforms.	Molecular diagnosis & therapy	REVIEW
16941129	Pubmed	FALSE	2007	Wurm	Early fatal course in siblings with CDG-Ia (caused by two novel mutations in the PMM2 gene): clinical, molecular and autopsy findings.	European journal of pediatrics	Without immunological involvement
17158594	Pubmed	TRUE	2007	van de Kamp	Congenital disorder of glycosylation type Ia presenting with hydrops fetalis.	Journal of medical genetics
17451957	Pubmed	FALSE	2007	Coman	Congenital disorder of glycosylation type 1a: three siblings with a mild neurological phenotype.	Journal of clinical neuroscience : official journal of the Neurosurgical Society of Australasia	Without immunological involvement
17639595	Pubmed	FALSE	2007	Krasnewich	Clinical features in adults with congenital disorders of glycosylation type Ia (CDG-Ia).	American journal of medical genetics. Part C, Seminars in medical genetics	Without immunological involvement
17166182	Pubmed	FALSE	2007	Quelhas	Congenital disorder of glycosylation type Ia: searching for the origin of common mutations in PMM2.	Annals of human genetics	Without immunological involvement
17559065	Pubmed	FALSE	2007	Cerovský	Identification of three novel peptides isolated from the venom of the neotropical social wasp Polistes major major.	Journal of peptide science : an official publication of the European Peptide Society	Not about PMM2-CDG
18093857	Pubmed	FALSE	2008	Arnoux	Risk assessment of acute vascular events in congenital disorder of glycosylation type Ia.	Molecular genetics and metabolism	Without immunological involvement
18500572	Pubmed	FALSE	2008	Morava	Congenital disorder of glycosylation type Ix: review of clinical spectrum and diagnostic steps.	Journal of inherited metabolic disease	Not about PMM2-CDG
18024528	Pubmed	FALSE	2008	Pérez-Cerdá	Screening using serum percentage of carbohydrate-deficient transferrin for congenital disorders of glycosylation in children with suspected metabolic disease.	Clinical chemistry	Basic Research
18927083	Pubmed	FALSE	2008	Veiga-da-Cunha	Mammalian phosphomannomutase PMM1 is the brain IMP-sensitive glucose-1,6-bisphosphatase.	The Journal of biological chemistry	Basic Research - Mouse
18629883	Pubmed	FALSE	2008	Barone	Clinical phenotype correlates to glycoprotein phenotype in a sib pair with CDG-Ia.	American journal of medical genetics. Part A	Without immunological involvement
18462449	Pubmed	FALSE	2008	Coman	The skeletal manifestations of the congenital disorders of glycosylation.	Clinical genetics	REVIEW
17904539	Pubmed	FALSE	2008	Bons	A specific immunoprecipitation method for isolating isoforms of insulin-like growth factor binding protein-3 from serum.	Clinica chimica acta; international journal of clinical chemistry	Basic Research
18712764	Pubmed	FALSE	2008	Sturiale	Multiplexed glycoproteomic analysis of glycosylation disorders by sequential yolk immunoglobulins immunoseparation and MALDI-TOF MS.	Proteomics	Without immunological involvement
18571450	Pubmed	TRUE	2008	Truin	Pericardial and abdominal fluid accumulation in congenital disorder of glycosylation type Ia.	Molecular genetics and metabolism
21694295	Pubmed	FALSE	2008	Khan	Magnetostructural phase transitions in Ni(50)Mn(25+x)Sb(25-x) Heusler alloys.	Journal of physics. Condensed matter : an Institute of Physics journal	Not about PMM2-CDG
19272306	Pubmed	FALSE	2009	Grünewald	The clinical spectrum of phosphomannomutase 2 deficiency (CDG-Ia).	Biochimica et biophysica acta	REVIEW
19235233	Pubmed	FALSE	2009	Vega	Functional analysis of three splicing mutations identified in the PMM2 gene: toward a new therapy for congenital disorder of glycosylation type Ia.	Human mutation	Without immunological involvement
19157945	Pubmed	FALSE	2009	Higashidani	Exogenous mannose does not raise steady state mannose-6-phosphate pools of normal or N-glycosylation-deficient human fibroblasts.	Molecular genetics and metabolism	Basic Research
19490731	Pubmed	FALSE	2009	Kedzierski	Early CD44(hi)CD4+ and CD44(hi)CD8+ T cell numbers and the absence of mannose-rich glycoconjugates determine the protective outcome of anti-leishmanial immunity.	Parasitology	Not about PMM2-CDG
19099505	Pubmed	FALSE	2009	Tajiri	Dissociation profile of protonated fucosyl glycopeptides and quantitation of fucosylation levels of glycoproteins by mass spectrometry.	Journal of proteome research	Basic Research
19339218	Pubmed	FALSE	2009	Freeze	Towards a therapy for phosphomannomutase 2 deficiency, the defect in CDG-Ia patients.	Biochimica et biophysica acta	REVIEW
19862844	Pubmed	FALSE	2009	Haeuptle	Congenital disorders of glycosylation: an update on defects affecting the biosynthesis of dolichol-linked oligosaccharides.	Human mutation	REVIEW
19293578	Pubmed	FALSE	2009	Kapoor	Hyperinsulinism in developmental syndromes.	Endocrine development	REVIEW
18485644	Pubmed	FALSE	2009	Ishikawa	Different neuroradiological findings during two stroke-like episodes in a patient with a congenital disorder of glycosylation type Ia.	Brain & development	Without immunological involvement
19101518	Pubmed	FALSE	2009	Richard	Congenital disorder of glycosylation Ia: new differentially expressed proteins identified by 2-DE.	Biochemical and biophysical research communications
19165618	Pubmed	FALSE	2009	Thong	Congenital disorder of glycosylation type Ia in a Malaysian family: clinical outcome and description of a novel PMM2 mutation.	Journal of inherited metabolic disease	Without immunological involvement
19357119	Pubmed	FALSE	2009	Romano	Conotruncal heart defects in three patients with congenital disorder of glycosylation type Ia (CDG Ia).	Journal of medical genetics	Without immunological involvement
19176971	Pubmed	FALSE	2009	Malhotra	Prenatal cardiac ultrasound finding in congenital disorder of glycosylation type 1a.	Fetal diagnosis and therapy	Without immunological involvement
18948042	Pubmed	TRUE	2009	Pérez-Dueñas	Long-term evolution of eight Spanish patients with CDG type Ia: typical and atypical manifestations.	European journal of paediatric neurology : EJPN : official journal of the European Paediatric Neurology Society
19757145	Pubmed	FALSE	2009	Footitt	Cardiomyopathy in the congenital disorders of glycosylation (CDG): a case of late presentation and literature review.	Journal of inherited metabolic disease	REVIEW
19396570	Pubmed	TRUE	2009	Shanti	Congenital disorder of glycosylation type Ia: heterogeneity in the clinical presentation from multivisceral failure to hyperinsulinaemic hypoglycaemia as leading symptoms in three infants with phosphomannomutase deficiency.	Journal of inherited metabolic disease
20920368	Pubmed	FALSE	2010	Yu	Molecular analysis of phosphomannomutase (PMM) genes reveals a unique PMM duplication event in diverse Triticeae species and the main PMM isozymes in bread wheat tissues.	BMC plant biology	Basic Research
21433361	Pubmed	FALSE	2010	Hedrick	Therapeutic Inhibitors of Phosphomannose Isomerase - Probe 1		REVIEW
20661555	Pubmed	FALSE	2010	Quental	Evolutionary history and functional diversification of phosphomannomutase genes.	Journal of molecular evolution	Basic Research
20398363	Pubmed	FALSE	2010	Al-Owain	A novel mutation and first report of dilated cardiomyopathy in ALG6-CDG (CDG-Ic): a case report.	Orphanet journal of rare diseases	Not about PMM2-CDG
20378176	Pubmed	FALSE	2010	Boddaert	Posterior fossa imaging in 158 children with ataxia.	Journal of neuroradiology = Journal de neuroradiologie	Without immunological involvement
21433366	Pubmed	FALSE	2010	Hedrick	Therapeutic Inhibitors of Phosphomannose Isomerase - Probe 2		Basic Research - Theurapeutic Inhibitor
20679665	Pubmed	FALSE	2010	Dupré	Guanosine diphosphate-mannose:GlcNAc2-PP-dolichol mannosyltransferase deficiency (congenital disorders of glycosylation type Ik): five new patients and seven novel mutations.	Journal of medical genetics	Not about PMM2-CDG
20638314	Pubmed	FALSE	2010	Léticée	Should PMM2-deficiency (CDG Ia) be searched in every case of unexplained hydrops fetalis?	Molecular genetics and metabolism	Without immunological involvement
23430838	Pubmed	FALSE	2011	Pérez	The molecular landscape of phosphomannose mutase deficiency in iberian peninsula: identification of 15 population-specific mutations.	JIMD reports	Without immunological involvement
20814826	Pubmed	FALSE	2011	Gubbels	FSH isoform pattern in classic galactosemia.	Journal of inherited metabolic disease	Without immunological involvement
21615139	Pubmed	FALSE	2011	Sirtori	Unusually large magnetic anisotropy in electrochemically deposited Co-rich Co-Pt films.	ACS applied materials & interfaces	Not about PMM2-CDG
20512605	Pubmed	FALSE	2011	Chu	DFT investigation on the reaction mechanism catalyzed by α-phosphomannomutase1 in protonated/deprotonated states.	Journal of molecular modeling	Not about PMM2-CDG
23430830	Pubmed	FALSE	2011	Millón	Two Argentinean Siblings with CDG-Ix: A Novel Type of Congenital Disorder of Glycosylation?	JIMD reports	Not about PMM2-CDG
20199520	Pubmed	FALSE	2011	Melberg	Re-evaluation of the dysequilibrium syndrome.	Acta neurologica Scandinavica	Without immunological involvement
21737679	Pubmed	FALSE	2011	Gao	Mannose-6-phosphate regulates destruction of lipid-linked oligosaccharides.	Molecular biology of the cell	Not about PMM2-CDG
21384227	Pubmed	FALSE	2011	Sturiale	The impact of mass spectrometry in the diagnosis of congenital disorders of glycosylation.	Journal of inherited metabolic disease	REVIEW
22157680	Pubmed	FALSE	2011	Schneider	Successful prenatal mannose treatment for congenital disorder of glycosylation-Ia in mice.	Nature medicine	Basic Research
21949237	Pubmed	FALSE	2011	Sharma	Phosphomannose isomerase inhibitors improve N-glycosylation in selected phosphomannomutase-deficient fibroblasts.	The Journal of biological chemistry	Basic Research
21541725	Pubmed	FALSE	2011	Vega	Expression analysis revealing destabilizing mutations in phosphomannomutase 2 deficiency (PMM2-CDG): expression analysis of PMM2-CDG mutations.	Journal of inherited metabolic disease	Basic Research
21347588	Pubmed	FALSE	2011	Thiel	Mouse models for congenital disorders of glycosylation.	Journal of inherited metabolic disease	Basic Research
21539312	Pubmed	FALSE	2011	Dahl	Potent, selective, and orally available benzoisothiazolone phosphomannose isomerase inhibitors as probes for congenital disorder of glycosylation Ia.	Journal of medicinal chemistry	Basic Research
22012410	Pubmed	TRUE	2012	Casado	Mild clinical and biochemical phenotype in two patients with PMM2-CDG (congenital disorder of glycosylation Ia).	Cerebellum (London, England)
22386715	Pubmed	FALSE	2012	Mohamed	Thyroid function in PMM2-CDG: diagnostic approach and proposed management.	Molecular genetics and metabolism	Without immunological involvement
22374380	Pubmed	FALSE	2012	Rudaks	Hypertrophic cardiomyopathy with cardiac rupture and tamponade caused by congenital disorder of glycosylation type Ia.	Pediatric cardiology	Without immunological involvement
22966035	Pubmed	FALSE	2012	Morava	Defining the phenotype in congenital disorder of glycosylation due to ALG1 mutations.	Pediatrics	Not about PMM2-CDG
22888636	Pubmed	FALSE	2012	Davalieva	Proteomic analysis of infiltrating ductal carcinoma tissues by coupled 2-D DIGE/MS/MS analysis.	Molekuliarnaia biologiia	Not about PMM2-CDG
23430905	Pubmed	TRUE	2012	Verstegen	Lymphatic edema in congenital disorders of glycosylation.	JIMD reports
23045520	Pubmed	FALSE	2012	Coorg	Child Neurology: a case of PMM2-CDG (CDG 1a) presenting with unusual eye movements.	Neurology	Without immunological involvement
22115769	Pubmed	TRUE	2012	Pérez	Segmental uniparental disomy leading to homozygosity for a pathogenic mutation in three recessive metabolic diseases.	Molecular genetics and metabolism
22496445	Pubmed	FALSE	2012	He	Identification of intercellular cell adhesion molecule 1 (ICAM-1) as a hypoglycosylation marker in congenital disorders of glycosylation cells.	The Journal of biological chemistry	Basic Research
22959829	Pubmed	FALSE	2012	Honzík	Clinical picture of S-adenosylhomocysteine hydrolase deficiency resembles phosphomannomutase 2 deficiency.	Molecular genetics and metabolism	Not about PMM2-CDG
22801829	Pubmed	FALSE	2012	Thompson	Retinal on-pathway deficit in congenital disorder of glycosylation due to phosphomannomutase deficiency.	Archives of ophthalmology (Chicago, Ill. : 1960)	Without immunological involvement
23430927	Pubmed	FALSE	2012	Vuillaumier-Barrot	Expanding the Spectrum of PMM2-CDG Phenotype.	JIMD reports	Without immunological involvement
23082948	Pubmed	FALSE	2012	de la Morena-Barrio	Congenital disorder of glycosylation (PMM2-CDG) in a patient with antithrombin deficiency and severe thrombophilia.	Journal of thrombosis and haemostasis : JTH	Without immunological involvement
22956764	Pubmed	FALSE	2012	Cline	A zebrafish model of PMM2-CDG reveals altered neurogenesis and a substrate-accumulation mechanism for N-linked glycosylation deficiency.	Molecular biology of the cell	Basic Research
26425584	Pubmed	TRUE	2013	Miller	rhIGF-1 Therapy for Growth Failure and IGF-1 Deficiency in Congenital Disorder of Glycosylation Ia (PMM2 Deficiency).	Journal of investigative medicine high impact case reports
24063868	Pubmed	FALSE	2013	Wolthuis	Abnormal fat distribution in PMM2-CDG.	Molecular genetics and metabolism	REVIEW
23988505	Pubmed	FALSE	2013	Bortot	PMM2-CDG: phenotype and genotype in four affected family members.	Gene	Without immunological involvement
23904513	Pubmed	FALSE	2013	Cochran	Single nucleotide polymorphisms in candidate genes associated with fertilizing ability of sperm and subsequent embryonic development in cattle.	Biology of reproduction	Not about PMM2-CDG
22327749	Pubmed	FALSE	2013	Kapusta	From discrete dilated cardiomyopathy to successful cardiac transplantation in congenital disorders of glycosylation due to dolichol kinase deficiency (DK1-CDG).	Heart failure reviews	Not about PMM2-CDG
24139637	Pubmed	FALSE	2013	de la Morena-Barrio	GPI-anchor and GPI-anchored protein expression in PMM2-CDG patients.	Orphanet journal of rare diseases	Basic Research
23430200	Pubmed	FALSE	2013	Thompson	Retinal characteristics of the congenital disorder of glycosylation PMM2-CDG.	Journal of inherited metabolic disease	Without immunological involvement
23430515	Pubmed	FALSE	2013	Dercksen	ALG6-CDG in South Africa: Genotype-Phenotype Description of Five Novel Patients.	JIMD reports	Not about PMM2-CDG
24498599	Pubmed	FALSE	2013	Andreotti	Biochemical phenotype of a common disease-causing mutation and a possible therapeutic approach for the phosphomannomutase 2-associated disorder of glycosylation.	Molecular genetics & genomic medicine	Basic Research
23890587	Pubmed	FALSE	2013	Helander	Dolichol kinase deficiency (DOLK-CDG) with a purely neurological presentation caused by a novel mutation.	Molecular genetics and metabolism	Not about PMM2-CDG
24305089	Pubmed	FALSE	2013	Sun	Insufficient ER-stress response causes selective mouse cerebellar granule cell degeneration resembling that seen in congenital disorders of glycosylation.	Molecular brain	Basic Research
23499581	Pubmed	FALSE	2013	Linssen	Thrombotic complications in patients with PMM2-CDG.	Molecular genetics and metabolism	Review
23622397	Pubmed	FALSE	2013	Jaeken	Congenital disorders of glycosylation.	Handbook of clinical neurology	Review
22983704	Pubmed	FALSE	2013	Matthijs	Approaches to homozygosity mapping and exome sequencing for the identification of novel types of CDG.	Glycoconjugate journal	Not about PMM2-CDG (They talk about CDG in general)
24554337	Pubmed	FALSE	2014	Rymen	Skin manifestations in CDG.	Journal of inherited metabolic disease	Review
24424124	Pubmed	FALSE	2014	Jaeken	Clinical utility gene card for: Phosphomannomutase 2 deficiency.	European journal of human genetics : EJHG	Gene Card - PMM2-CDG
25192236	Pubmed	FALSE	2014	Stefanits	Initial diagnosis of the congenital disorder of glycosylation PMM2-CDG (CDG1a) in a 4-year-old girl after neurosurgical intervention for cerebral hemorrhage.	Journal of neurosurgery. Pediatrics	Without immunological involvement
25793077	Pubmed	FALSE	2014	Işıkay	A case of congenital disorder of glycosylation ia presented with recurrent pericardial effusion.	Iranian journal of pediatrics	Without immunological involvement
24506781	Pubmed	FALSE	2014	Siva	Exon-skipping antisense oligonucleotides to correct missplicing in neurogenetic diseases.	Nucleic acid therapeutics	Talks about various neurological diseases
24037084	Pubmed	FALSE	2014	Al-Maawali	Subcutaneous fat pads on body MRI--an early sign of congenital disorder of glycosylation PMM2-CDG (CDG1a).	Pediatric radiology	Without immunological involvement
24524732	Pubmed	FALSE	2014	Wolthuis	Defining the phenotype and diagnostic considerations in adults with congenital disorders of N-linked glycosylation.	Expert review of molecular diagnostics	REVIEW
24474243	Pubmed	FALSE	2014	He	N-glycosylation deficiency reduces ICAM-1 induction and impairs inflammatory response.	Glycobiology	Basic Research
24493206	Pubmed	FALSE	2014	Messenger	Ophthalmic findings in an infant with phosphomannomutase deficiency.	Documenta ophthalmologica. Advances in ophthalmology	Without immunological involvement
26331032	Pubmed	FALSE	2014	Noreau	Exome sequencing revealed PMM2 gene mutations in a French-Canadian family with congenital atrophy of the cerebellum.	Cerebellum & ataxias	Without immunological involvement
24555185	Pubmed	FALSE	2014	Kouwenberg	Wrinkled skin and fat pads in patients with ALG8-CDG: revisiting skin manifestations in congenital disorders of glycosylation.	Pediatric dermatology	Not about PMM2-CDG
24388574	Pubmed	FALSE	2014	de la Morena-Barrio	Proteomic analysis of platelet N-glycoproteins in PMM2-CDG patients.	Thrombosis research	Basic Research
25497157	Pubmed	FALSE	2014	Monin	29 French adult patients with PMM2-congenital disorder of glycosylation: outcome of the classical pediatric phenotype and depiction of a late-onset phenotype.	Orphanet journal of rare diseases	Without immunological involvement
25173107	Pubmed	FALSE	2014	Chen	Common variants near ABCA1 and in PMM2 are associated with primary open-angle glaucoma.	Nature genetics	Not about PMM2-CDG
24739649	Pubmed	FALSE	2014	Resende	Congenital disorders of glycosylation with neonatal presentation.	BMJ case reports	Without immunological involvement
25192513	Pubmed	FALSE	2014	Barone	Congenital disorders of glycosylation with emphasis on cerebellar involvement.	Seminars in neurology	REVIEW
24359113	Pubmed	TRUE	2014	Coss	N-glycan abnormalities in children with galactosemia.	Journal of proteome research
26887550	Pubmed	FALSE	2015	Ren	[Clinical and genetic analysis for two children with congenital disturbance of glycosylation with PMM2 gene mutations].	Zhonghua er ke za zhi = Chinese journal of pediatrics	Not in English
26502900	Pubmed	FALSE	2015	Serrano	Phosphomannomutase deficiency (PMM2-CDG): ataxia and cerebellar assessment.	Orphanet journal of rare diseases	Without immunological involvement
25596524	Pubmed	FALSE	2015	Tassano	Clinical and molecular delineation of a 16p13.2p13.13 microduplication.	European journal of medical genetics	Not about PMM2-CDG
25560542	Pubmed	FALSE	2015	Liu	High-pressure orthorhombic ferromagnesite as a potential deep-mantle carbon carrier.	Scientific reports	Not about PMM2-CDG
25355454	Pubmed	TRUE	2015	Barone	A nationwide survey of PMM2-CDG in Italy: high frequency of a mild neurological variant associated with the L32R mutation.	Journal of neurology
26443248	Pubmed	FALSE	2015	Mehrjoo	Carrier Testing in Known Autosomal Recessive Intellectual Disability Genes in an Iranian Healthy Individual Using Exome Sequencing.	Archives of Iranian medicine	Without immunological involvement
26141167	Pubmed	FALSE	2015	Himmelreich	Lack of phosphomannomutase 2 affects Xenopus laevis morphogenesis and the non-canonical Wnt5a/Ror2 signalling.	Journal of inherited metabolic disease	Basic Research
25554634	Pubmed	FALSE	2015	Bertalan	A rapid, modular and marker-free chloroplast expression system for the green alga Chlamydomonas reinhardtii.	Journal of biotechnology	Not about PMM2-CDG
26014514	Pubmed	FALSE	2015	Yuste-Checa	The Effects of PMM2-CDG-Causing Mutations on the Folding, Activity, and Stability of the PMM2 Protein.	Human mutation	Basic Research
26488408	Pubmed	FALSE	2015	Andreotti	Heterodimerization of Two Pathological Mutants Enhances the Activity of Human Phosphomannomutase2.	PloS one	Basic Research
25681648	Pubmed	FALSE	2015	Choi	Application of whole exome sequencing to a rare inherited metabolic disease with neurological and gastrointestinal manifestations: a congenital disorder of glycosylation mimicking glycogen storage disease.	Clinica chimica acta; international journal of clinical chemistry	Without immunological involvement
26383992	Pubmed	FALSE	2015	Trikha	A Genetic Variant in TGFBR3-CDC7 Is Associated with Visual Field Progression in Primary Open-Angle Glaucoma Patients from Singapore.	Ophthalmology	Without immunological involvement
27415628	Pubmed	TRUE	2016	García-López	Natural Killer Cell Receptors and Cytotoxic Activity in Phosphomannomutase 2 Deficiency (PMM2-CDG).	PloS one
26453362	Pubmed	FALSE	2016	Fiumara	Electroclinical Features of Early-Onset Epileptic Encephalopathies in Congenital Disorders of Glycosylation (CDGs).	JIMD reports	Not PMM2-CDG
26430078	Pubmed	FALSE	2016	Zhang	A Novel N-Tetrasaccharide in Patients with Congenital Disorders of Glycosylation, Including Asparagine-Linked Glycosylation Protein 1, Phosphomannomutase 2, and Mannose Phosphate Isomerase Deficiencies.	Clinical chemistry	Basic Research (diagnosis)
26805780	Pubmed	FALSE	2016	Kane	Mitotic Intragenic Recombination: A Mechanism of Survival for Several Congenital Disorders of Glycosylation.	American journal of human genetics	Basic Research (genetics)
26785728	Pubmed	FALSE	2016	Thiesler	Glycomic Characterization of Induced Pluripotent Stem Cells Derived from a Patient Suffering from Phosphomannomutase 2 Congenital Disorder of Glycosylation (PMM2-CDG).	Molecular & cellular proteomics : MCP	Basic Research (model)
27353517	Pubmed	FALSE	2016	Wang	Next-generation sequencing-based molecular diagnosis of neonatal hypotonia in Chinese Population.	Scientific reports	No immune involvement
26423071	Pubmed	FALSE	2016	Huang	Low BIK outside-inside-out interactive inflammation immune-induced transcription-dependent apoptosis through FUT3-PMM2-SQSTM1-SFN-ZNF384.	Immunologic research	Not PMM2-CDG
26940433	Pubmed	FALSE	2016	Parkinson	Synaptic roles for phosphomannomutase type 2 in a new Drosophila congenital disorder of glycosylation disease model.	Disease models & mechanisms	Basic Research (model)
26335155	Pubmed	FALSE	2016	Bengtson	Serum transferrin carrying the xeno-tetrasaccharide NeuAc-Gal-GlcNAc2 is a biomarker of ALG1-CDG.	Journal of inherited metabolic disease	Basic Research (diagnosis)
27343064	Pubmed	FALSE	2016	Sabry	A case of fatal Type I congenital disorders of glycosylation (CDG I) associated with low dehydrodolichol diphosphate synthase (DHDDS) activity.	Orphanet journal of rare diseases	Not PMM2-CDG
27134828	Pubmed	FALSE	2016	Heywood	Global serum glycoform profiling for the investigation of dystroglycanopathies & Congenital Disorders of Glycosylation.	Molecular genetics and metabolism reports	Basic research
29280746	Pubmed	FALSE	2017	Demirbilek	Congenital Hyperinsulinism: Diagnosis and Treatment Update.	Journal of clinical research in pediatric endocrinology	Review
28762107	Pubmed	FALSE	2017	Kasapkara	PMM2-CDG and sensorineural hearing loss.	Journal of inherited metabolic disease	No immune involvement
28742265	Pubmed	FALSE	2017	Alsubhi	Congenital disorders of glycosylation: The Saudi experience.	American journal of medical genetics. Part A	No immune involvement
28542629	Pubmed	FALSE	2017	Ortega	Characteristics of candidate genes associated with embryonic development in the cow: Evidence for a role for WBP1 in development to the blastocyst stage.	PloS one	Non-human basic research
28425223	Pubmed	FALSE	2017	Vals	Three families with mild PMM2-CDG and normal cognitive development.	American journal of medical genetics. Part A	No immune involvement
28566178	Pubmed	FALSE	2017	Rossi	Expanding the phenotype of phosphomannomutase-2 gene congenital disorder of glycosylation: Cervical dystonia.	Journal of the neurological sciences	No immune involvement
28139241	Pubmed	FALSE	2017	Pérez-Cerdá	A Population-Based Study on Congenital Disorders of Protein N- and Combined with O-Glycosylation Experience in Clinical and Genetic Diagnosis.	The Journal of pediatrics	No immune involvement in this article
28259397	Pubmed	FALSE	2017	Ortega	Association of single nucleotide polymorphisms in candidate genes previously related to genetic variation in fertility with phenotypic measurements of reproductive function in Holstein cows.	Journal of dairy science	Non-human basic research
28855921	Pubmed	FALSE	2017	Demirbilek	Diagnosis and treatment of hyperinsulinaemic hypoglycaemia and its implications for paediatric endocrinology.	International journal of pediatric endocrinology	Review
29261720	Pubmed	FALSE	2017	Citro	A mutant of phosphomannomutase1 retains full enzymatic activity, but is not activated by IMP: Possible implications for the disease PMM2-CDG.	PloS one	Basic research
28915903	Pubmed	FALSE	2017	Serrano	A quantitative assessment of the evolution of cerebellar syndrome in children with phosphomannomutase-deficiency (PMM2-CDG).	Orphanet journal of rare diseases	No immune involvement
28807751	Pubmed	FALSE	2017	Vicario	A novel PMCA3 mutation in an ataxic patient with hypomorphic phosphomannomutase 2 (PMM2) heterozygote mutations: Biochemical characterization of the pump defect.	Biochimica et biophysica acta. Molecular basis of disease	No immune involvement
28341975	Pubmed	FALSE	2017	de Diego	Longitudinal volumetric and 2D assessment of cerebellar atrophy in a large cohort of children with phosphomannomutase deficiency (PMM2-CDG).	Journal of inherited metabolic disease	No immune involvement
28108845	Pubmed	FALSE	2017	Marques-da-Silva	Liver involvement in congenital disorders of glycosylation (CDG). A systematic review of the literature.	Journal of inherited metabolic disease	Review
28122681	Pubmed	FALSE	2017	Al Teneiji	Phenotypic and genotypic spectrum of congenital disorders of glycosylation type I and type II.	Molecular genetics and metabolism	No immune involvement
28662078	Pubmed	FALSE	2017	Yuste-Checa	DPAGT1-CDG: Functional analysis of disease-causing pathogenic mutations and role of endoplasmic reticulum stress.	PloS one	Not PMM2-CDG
27774737	Pubmed	FALSE	2017	Yuste-Checa	Pharmacological Chaperoning: A Potential Treatment for PMM2-CDG.	Human mutation	Basic research (therapy)
28373276	Pubmed	FALSE	2017	Cabezas	Polycystic Kidney Disease with Hyperinsulinemic Hypoglycemia Caused by a Promoter Mutation in Phosphomannomutase 2.	Journal of the American Society of Nephrology : JASN	No immune involvement
29492447	Pubmed	FALSE	2017	Sakai	Anesthetic management of a child with phosphomannomutase-2 congenital disorder of glycosylation (PMM2-CDG).	JA clinical reports	No immune involvement
29417701	Pubmed	FALSE	2018	Yamada	Impact of novel oncogenic pathways regulated by antitumor miR-451a in renal cell carcinoma.	Cancer science	Basic research
28685491	Pubmed	FALSE	2018	Vals	The Prevalence of PMM2-CDG in Estonia Based on Population Carrier Frequencies and Diagnosed Patients.	JIMD reports	Epidemiologic research
29654385	Pubmed	FALSE	2018	Ferreira	Recognizable phenotypes in CDG.	Journal of inherited metabolic disease	Review
29079546	Pubmed	FALSE	2018	Péanne	Congenital disorders of glycosylation (CDG): Quo vadis?	European journal of medical genetics	Review
30397276	Pubmed	TRUE	2018	Asteggiano	Ten years of screening for congenital disorders of glycosylation in Argentina: case studies and pitfalls.	Pediatric research
33265642	Pubmed	FALSE	2018	Palazzo	Hierarchical Structure of Generalized Thermodynamic and Informational Entropy.	Entropy (Basel, Switzerland)	Physics
30061496	Pubmed	FALSE	2018	Citro	The Analysis of Variants in the General Population Reveals That	International journal of molecular sciences	Basic research
29361989	Pubmed	TRUE	2018	Wu	Atrial septal defect in a patient with congenital disorder of glycosylation type 1a: a case report.	Journal of medical case reports
30740408	Pubmed	FALSE	2018	Chang	Congenital disorders of glycosylation.	Annals of translational medicine	Review
28671287	Pubmed	FALSE	2018	Gámez	Protein misfolding diseases: Prospects of pharmacological treatment.	Clinical genetics	Review
29277971	Pubmed	FALSE	2018	Ma	Intake of Fish Oil Specifically Modulates Colonic Muc2 Expression in Middle-Aged Rats by Suppressing the Glycosylation Process.	Molecular nutrition & food research	Non-human basic research
28940310	Pubmed	FALSE	2018	Bastaki	Single-center experience of N-linked Congenital Disorders of Glycosylation with a Summary of Molecularly Characterized Cases in Arabs.	Annals of human genetics
29229467	Pubmed	FALSE	2018	Altassan	Renal involvement in PMM2-CDG, a mini-review.	Molecular genetics and metabolism	Review
30149901	Pubmed	FALSE	2018	Yang	Identification of clinical tumor stages related mRNAs and miRNAs in cervical squamous cell carcinoma.	Pathology, research and practice	Not PMM2-CDG
30687093	Pubmed	FALSE	2018	Wang	Phenotype-Driven Virtual Panel Is an Effective Method to Analyze WES Data of Neurological Disease.	Frontiers in pharmacology	No immune involvement
29470411	Pubmed	TRUE	2018	Izquierdo-Serra	Stroke-Like Episodes and Cerebellar Syndrome in Phosphomannomutase Deficiency (PMM2-CDG): Evidence for Hypoglycosylation-Driven Channelopathy.	International journal of molecular sciences
29472449	Pubmed	FALSE	2018	Mukaigasa	Nrf2 activation attenuates genetic endoplasmic reticulum stress induced by a mutation in the phosphomannomutase 2 gene in zebrafish.	Proceedings of the National Academy of Sciences of the United States of America	Basic research
30857461	Pubmed	TRUE	2019	Farmania	Unusual Presentation of PMM2-Congenital Disorder of Glycosylation With Isolated Strokelike Episodes in a Young Girl.	Journal of child neurology
30530630	Pubmed	FALSE	2019	Lao	Yeast Models of Phosphomannomutase 2 Deficiency, a Congenital Disorder of Glycosylation.	G3 (Bethesda, Md.)	Basic research
29669613	Pubmed	FALSE	2019	Dixon	Alternative rib bone biopsy measurements to estimate changes in skeletal mineral reserves in cattle.	Animal : an international journal of animal bioscience	Non-human basic research
31509139	Pubmed	FALSE	2019	Ovchinnikov	Multifaceted Sn-Sn bonding in the solid state. Synthesis and structural characterization of four new Ca-Li-Sn compounds.	Dalton transactions (Cambridge, England : 2003)	Chemistry
31640729	Pubmed	TRUE	2019	Grünert	Unsuccessful intravenous D-mannose treatment in PMM2-CDG.	Orphanet journal of rare diseases
31803566	Pubmed	FALSE	2019	Van Hees	Ophthalmological and electrophysiological findings in monozygotic twin sisters with phosphomannomutase 2 deficiency (PMM2-CDG) over a period of 37 years.	GMS ophthalmology cases	No immune involvement
31251625	Pubmed	FALSE	2019	Jiao	2D Magnetic Janus Semiconductors with Exotic Structural and Quantum-Phase Transitions.	The journal of physical chemistry letters	Chemistry
31117816	Pubmed	FALSE	2019	van den Boogert	N-Glycosylation Defects in Humans Lower Low-Density Lipoprotein Cholesterol Through Increased Low-Density Lipoprotein Receptor Expression.	Circulation	No immune involvement
30071302	Pubmed	FALSE	2019	Abiramalatha	A family with floppy neonates with severe respiratory insufficiency: A lethal phenotype of RFT1-CDG due to a novel mutation.	European journal of medical genetics	Not PMM2-CDG
31636082	Pubmed	FALSE	2019	Iyer	Repurposing the aldose reductase inhibitor and diabetic neuropathy drug epalrestat for the congenital disorder of glycosylation PMM2-CDG.	Disease models & mechanisms	Basic research (therapy)
31115488	Pubmed	FALSE	2019	Bortot	In vitro treatment of congenital disorder of glycosylation type Ia using PLGA nanoparticles loaded with GDP‑Man.	International journal of molecular medicine	Basic research (therapy)
31727010	Pubmed	TRUE	2019	Zhang	Clinical and whole-exome sequencing findings in two siblings from Hani ethnic minority with congenital glycosylation disorders.	BMC medical genetics
30464053	Pubmed	FALSE	2019	Martinez-Monseny	From gestalt to gene: early predictive dysmorphic features of PMM2-CDG.	Journal of medical genetics	No immune involvement
30008170	Pubmed	FALSE	2019	Marques-da-Silva	An Electronic Questionnaire for Liver Assessment in Congenital Disorders of Glycosylation (LeQCDG): A Patient-Centered Study.	JIMD reports	No immune involvement
30653653	Pubmed	FALSE	2019	Medrano	Clinical and molecular diagnosis of non-phosphomannomutase 2 N-linked congenital disorders of glycosylation in Spain.	Clinical genetics	Not PMM2-CDG
30406445	Pubmed	FALSE	2019	Yang	Gene variants identified by whole-exome sequencing in 33 French women with premature ovarian insufficiency.	Journal of assisted reproduction and genetics	No immune involvement
30454869	Pubmed	FALSE	2019	Francisco	The challenge of CDG diagnosis.	Molecular genetics and metabolism	Review
30293989	Pubmed	FALSE	2019	Witters	Long-term follow-up in PMM2-CDG: are we ready to start treatment trials?	Genetics in medicine : official journal of the American College of Medical Genetics	No immune involvement
31454904	Pubmed	FALSE	2019	Monticelli	β-Glucose-1,6-Bisphosphate Stabilizes Pathological Phophomannomutase2 Mutants In Vitro and Represents a Lead Compound to Develop Pharmacological Chaperones for the Most Common Disorder of Glycosylation, PMM2-CDG.	International journal of molecular sciences	Basic research (therapy)
31981409	Pubmed	FALSE	2020	Yıldız	Genotypes and estimated prevalence of phosphomannomutase 2 deficiency in Turkey differ significantly from those in Europe.	REFERENCES	No immune involvement
33270637	Pubmed	FALSE	2020	Brauner	Pituitary stalk interruption syndrome is characterized by genetic heterogeneity.	PloS one	No confirmation of PMM2-CDG
32962735	Pubmed	FALSE	2020	Taday	Dietary mannose supplementation in phosphomannomutase 2 deficiency (PMM2-CDG).	Orphanet journal of rare diseases	No immune involvement
32222543	Pubmed	FALSE	2020	Vilas	Proteostasis regulators as potential rescuers of PMM2 activity.	Biochimica et biophysica acta. Molecular basis of disease	Basic research (therapy)
33209585	Pubmed	TRUE	2020	Görlacher	Fatal outcome after heart surgery in PMM2-CDG due to a rare homozygous gene variant with double effects.	Molecular genetics and metabolism reports
32635232	Pubmed	FALSE	2020	Francisco	New Insights into Immunological Involvement in Congenital Disorders of Glycosylation (CDG) from a People-Centric Approach.	Journal of clinical medicine	We cant tell which are new or not and which were previously described to have immune findings
32071842	Pubmed	FALSE	2020	Moravej	Hypoglycemia in CDG patients due to PMM2 mutations: Follow up on hyperinsulinemic patients.	JIMD reports	No immune involvement
32874916	Pubmed	FALSE	2020	González-Domínguez	Identification through exome sequencing of the first PMM2-CDG individual of Mexican mestizo origin.	Molecular genetics and metabolism reports	No immune involvement
33133147	Pubmed	FALSE	2020	Slaba	Novel Splicing Variant in the	Frontiers in genetics	No immune involvement
33204593	Pubmed	FALSE	2020	Qian	Vascular ring anomaly in a patient with phosphomannomutase 2 deficiency: A case report and review of the literature.	JIMD reports	No immune involvement
31902100	Pubmed	FALSE	2020	Peng	Novel PMM2 missense mutation in a Chinese family with non-syndromic premature ovarian insufficiency.	Journal of assisted reproduction and genetics	No immune involvement
32595772	Pubmed	FALSE	2020	Soares	Hyperinsulinaemic Hypoglycaemia and Polycystic Kidney Disease - A Rare Case Concerning	European endocrinology	No immune involvement
33036649	Pubmed	FALSE	2020	López-Gálvez	Factor XII in PMM2-CDG patients: role of N-glycosylation in the secretion and function of the first element of the contact pathway.	Orphanet journal of rare diseases	No immune involvement
34055813	Pubmed	FALSE	2020	Prasher	Persistent Hypoglycemia with Polycystic Kidneys: A Rare Combination - A Case Report.	Biomedicine hub	No immune involvement
32685345	Pubmed	TRUE	2020	Vaes	PMM2-CDG caused by uniparental disomy: Case report and literature review.	JIMD reports
32712172	Pubmed	FALSE	2020	Gámez	New and potential strategies for the treatment of PMM2-CDG.	Biochimica et biophysica acta. General subjects	Review
32185602	Pubmed	FALSE	2020	Gϋemes	Hyperinsulinemic hypoglycemia in children and adolescents: Recent advances in understanding of pathophysiology and management.	Reviews in endocrine & metabolic disorders	Review
32799476	Pubmed	FALSE	2020	Hibble	Intra- and Interchain Interactions in (Cu	Inorganic chemistry	Research on material and physics
32630370	Pubmed	FALSE	2020	Doroftei	In Vitro Fertilisation (IVF) Associated with Preimplantation Genetic Testing for Monogenic Diseases (PGT-M) in a Romanian Carrier Couple for Congenital Disorder of Glycosylation Type Ia (CDG-Ia): A Case Report.	Genes	IVF embryo testing
32841164	Pubmed	FALSE	2020	Moreno Macián	Mutations in PMM2 gene in four unrelated Spanish families with polycystic kidney disease and hyperinsulinemic hypoglycemia.	Journal of pediatric endocrinology & metabolism : JPEM	No immune involvement
33413482	Pubmed	FALSE	2021	Starosta	Liver manifestations in a cohort of 39 patients with congenital disorders of glycosylation: pin-pointing the characteristics of liver injury and proposing recommendations for follow-up.	Orphanet journal of rare diseases	No immune involvement
34405919	Pubmed	FALSE	2021	Mikó	Identification of incompletely penetrant variants and interallelic interactions in autosomal recessive disorders by a population-genetic approach.	REFERENCES	No immune involvement
33340551	Pubmed	FALSE	2021	Quelhas	Congenital Disorders of Glycosylation in Portugal-Two Decades of Experience.	The Journal of pediatrics	No immune involvement
33811480	Pubmed	FALSE	2021	Islam	Founder mutation in the PMM2 promotor causes hyperinsulinemic hypoglycaemia/polycystic kidney disease (HIPKD).	Molecular genetics & genomic medicine	No immune involvement
33580824	Pubmed	FALSE	2021	Dorval	Cystic kidney diseases associated with mutations in phosphomannomutase 2 promotor: a large spectrum of phenotypes.	Pediatric nephrology (Berlin, Germany)	No immune involvement
33407696	Pubmed	TRUE	2021	Bogdańska	Clinical, biochemical and molecular phenotype of congenital disorders of glycosylation: long-term follow-up.	Orphanet journal of rare diseases
33663989	Pubmed	FALSE	2021	Lipiński	Congenital disorders of glycosylation in children - Histopathological and ultrastructural changes in the liver.	Pediatrics and neonatology	No immune involvement
35619972	Pubmed	FALSE	2021	Kirwin	Molecular Genetic Testing for Kidney Disorders During the COVID-19 Pandemic.	Delaware journal of public health	Not PMM2-CDG
33977037	Pubmed	FALSE	2021	Malheiro	Recurrent fetal truncus arteriosus associated with PMM2-CDG.	JIMD reports	No immune involvement
34546508	Pubmed	FALSE	2021	Thakor	Mutational landscape of TRPC6, WT1, LMX1B, APOL1, PTPRO, PMM2, LAMB2 and WT1 genes associated with Steroid resistant nephrotic syndrome.	Molecular biology reports	Not PMM2-CDG
34682117	Pubmed	FALSE	2021	Lipiński	Anthropometric Phenotype of Patients with PMM2-CDG.	Children (Basel, Switzerland)	No immune involvement
33858316	Pubmed	FALSE	2021	Madani	Novel Treatment for Congenital Disorder of Glycosylation in a Patient with Novel Homozygote Mutation of PMM2: A Case Report and Review Literature.	Endocrine, metabolic & immune disorders drug targets
34863624	Pubmed	FALSE	2021	Quelhas	Assessing the effects of PMM2 variants on protein stability.	Molecular genetics and metabolism	Basic Research (protein)
34277356	Pubmed	FALSE	2021	González-Domínguez	Non-functional alternative splicing caused by a Latino pathogenic variant in a case of PMM2-CDG.	Molecular genetics and metabolism reports	No immune involvement
34422808	Pubmed	FALSE	2021	Cui	Comprehensive Analysis of Glycolysis-Related Genes for Prognosis, Immune Features, and Candidate Drug Development in Colon Cancer.	Frontiers in cell and developmental biology	Not PMM2-CDG
34828263	Pubmed	FALSE	2021	Vaes	Genotype-Phenotype Correlations in PMM2-CDG.	Genes	No immune involvement
34652821	Pubmed	FALSE	2021	Ligezka	Sorbitol Is a Severity Biomarker for PMM2-CDG with Therapeutic Implications.	Annals of neurology	No immune involvement
34440401	Pubmed	FALSE	2021	Silver	Prevalence of Congenital Disorders of Glycosylation in Childhood Epilepsy and Effects of Anti-Epileptic Drugs on the Transferrin Isoelectric Focusing Test.	Genes	No immune involvement
34441372	Pubmed	FALSE	2021	Lipiński	Skeletal and Bone Mineral Density Features, Genetic Profile in Congenital Disorders of Glycosylation: Review.	Diagnostics (Basel, Switzerland)	Review
33583911	Pubmed	TRUE	2021	Masunaga	Primary ovarian insufficiency in a female with phosphomannomutase-2 gene (PMM2) mutations for congenital disorder of glycosylation.	Endocrine journal
33643843	Pubmed	FALSE	2021	Lipiński	Congenital disorders of glycosylation: Prevalence, incidence and mutational spectrum in the Polish population.	Molecular genetics and metabolism reports	No immune involvement
31870226	Pubmed	FALSE	2021	Thirumal Kumar	Identification of potential inhibitors against pathogenic missense mutations of PMM2 using a structure-based virtual screening approach.	Journal of biomolecular structure & dynamics	Basic Research
33619652	Pubmed	FALSE	2021	Pettinato	Clinical and radiological correlates of activities of daily living in cerebellar atrophy caused by PMM2 mutations (PMM2-CDG).	Cerebellum (London, England)	No immune involvement
34447415	Pubmed	FALSE	2021	Pajusalu	The Estimated Prevalence of N-Linked Congenital Disorders of Glycosylation Across Various Populations Based on Allele Frequencies in General Population Databases.	Frontiers in genetics	No immune involvement (only allele frequencies)
34784297	Pubmed	FALSE	2021	Klaver	Protease-dependent defects in N-cadherin processing drive PMM2-CDG pathogenesis.	JCI insight	Basic Research (Model)
34708008	Pubmed	TRUE	2021	Serrano	Stroke-Like Episodes in PMM2-CDG: When the Lack of Other Evidence Is the Only Evidence.	Frontiers in pediatrics
36221102	Pubmed	FALSE	2022	Lebredonchel	A PMM2-CDG caused by an A108V mutation associated with a heterozygous 70 kilobases deletion case report.	Italian journal of pediatrics	No immune involvement
34547194	Pubmed	FALSE	2022	Giri	Congenital hyperinsulinism: recent updates on molecular mechanisms, diagnosis and management.	References	Review
36309700	Pubmed	FALSE	2022	Pascoal	Patient reported outcomes for phosphomannomutase 2 congenital disorder of glycosylation (PMM2-CDG): listening to what matters for the patients and health professionals.	Orphanet journal of rare diseases	Reports on impact in QoL
34794894	Pubmed	FALSE	2022	França	Genetics of ovarian insufficiency and defects of folliculogenesis.	Best practice & research. Clinical endocrinology & metabolism	Not PMM2-CDG and review
35491370	Pubmed	FALSE	2022	Ligezka	Patient-reported outcomes and quality of life in PMM2-CDG.	Molecular genetics and metabolism	No immune involvement
36412659	Pubmed	FALSE	2022	Acharya	Hyperinsulinemic Hypoglycemia Due to	Pediatric reports	No immune involvement
36067531	Pubmed	FALSE	2022	Dong	PMM2 and NARFL are paternally imprinted genes in bovines.	REFERENCES	Non human basic research
35868775	Pubmed	FALSE	2022	Zhao	Overexpression of phosphomannomutase increases the production and bioactivities of Ganoderma exopolysaccharides.	Carbohydrate polymers	Basic Research
34420056	Pubmed	FALSE	2022	Parrado	Dissecting the transcriptional program of phosphomannomutase 2-deficient cells: Lymphoblastoide B cell lines as a valuable model for congenital disorders of glycosylation studies.	Glycobiology	Basic Research
35237617	Pubmed	FALSE	2022	Midena	Case Report: Multiple Retinal Astrocytic Hamartomas in Congenital Disorder of Glycosylation-Ia.	Frontiers in medicine	No immune involvement
35603178	Pubmed	FALSE	2022	de Haas	Evaluation of Cell Models to Study Monocyte Functions in PMM2 Congenital Disorders of Glycosylation.	Frontiers in immunology	Basic Research (Model)
35281664	Pubmed	TRUE	2022	Tiwary	The development of end stage renal disease in two patients with PMM2-CDG.	JIMD reports
36060529	Pubmed	FALSE	2022	Wada	Electrospray Ionization Mass Spectrometry of Transferrin: Use of Quadrupole Mass Analyzers for Congenital Disorders of Glycosylation.	Mass spectrometry (Tokyo, Japan)	Basic Research
36046393	Pubmed	FALSE	2022	Mousa	Acetazolamide treatment in late onset CDG type 1 due to biallelic pathogenic DHDDS variants.	Further reading	Not PMM2-CDG
35717947	Pubmed	FALSE	2022	Pascreau	N-Glycosylation Deficiency Reduces the Activation of Protein C and Disrupts Endothelial Barrier Integrity.	Thrombosis and haemostasis	Basic Research (Model)
35154715	Pubmed	TRUE	2022	Banderali	PMM2-CDG and nephrotic syndrome: A case report.	Clinical case reports
34859900	Pubmed	FALSE	2022	Briso-Montiano	Insight on molecular pathogenesis and pharmacochaperoning potential in phosphomannomutase 2 deficiency, provided by novel human phosphomannomutase 2 structures.	REFERENCES	Basic Research (protein)
35343544	Pubmed	FALSE	2022	Li	Study on superconducting Li-Se-H hydrides.	Physical chemistry chemical physics : PCCP	Research on material and physics
34648194	Pubmed	FALSE	2022	Munot	TRAPPC11-related muscular dystrophy with hypoglycosylation of alpha-dystroglycan in skeletal muscle and brain.	REFERENCES	Not PMM2-CDG
35308014	Pubmed	TRUE	2022	Vurallı	Hyperinsulinism May Be Underreported in Hypoglycemic Patients with Phosphomannomutase 2 Deficiency.	Journal of clinical research in pediatric endocrinology
35789514	Pubmed	FALSE	2022	Segovia-Falquina	A functional platform for the selection of pathogenic variants of PMM2 amenable to rescue via the use of pharmacological chaperones.	REFERENCES	Basic Research (therapy)
37180418	Pubmed	FALSE	2022	Feinberg	Congenital disorder of glycosylation - one size does not fit all: a parent's perspective.	Therapeutic advances in rare disease	No immune involvement
36294089	Pubmed	FALSE	2022	Francisco	A Participatory Framework for Plain Language Clinical Management Guideline Development.	International journal of environmental research and public health	Questionaire and no immune
35211808	Pubmed	FALSE	2022	Di Patria	Defective IGF-1 prohormone N-glycosylation and reduced IGF-1 receptor signaling activation in congenital disorders of glycosylation.	Cellular and molecular life sciences : CMLS	Basic Research
36997834	Pubmed	FALSE	2023	De Michele	Ataxia and Hypogonadism: a Review of the Associated Genes and Syndromes.	Cerebellum (London, England)	Review
37245379	Pubmed	FALSE	2023	Himmelreich	Complex metabolic disharmony in PMM2-CDG paves the way to new therapeutic approaches.	Molecular genetics and metabolism	Basic Research
37274081	Pubmed	FALSE	2023	Sreedevi		Global medical genetics	No immune involvement
36773065	Pubmed	TRUE	2023	Kiparissi	Phosphomannomutase 2 (PMM2) variants leading to hyperinsulinism-polycystic kidney disease are associated with early-onset inflammatory bowel disease and gastric antral foveolar hyperplasia.	Human genetics
37392701	Pubmed	FALSE	2023	Zdrazilova	Metabolic adaptation of human skin fibroblasts to ER stress caused by glycosylation defect in PMM2-CDG.	Molecular genetics and metabolism	Basic Research
37264420	Pubmed	FALSE	2023	Jia	A liposomal carbohydrate vaccine, adjuvanted with an NKT cell agonist, induces rapid and enhanced immune responses and antibody class switching.	Journal of nanobiotechnology	Basic Research(therapy)
37042760	Pubmed	FALSE	2023	Yoldas Celik	Unique clinical presentations and follow-up outcomes from experience with congenital disorders of glycosylation: PMM2-PGM1-DPAGT1-MPI-POMT2-B3GALNT2-DPM1-SRD5A3-CDG.	Journal of pediatric endocrinology & metabolism : JPEM	No immune involvement
37221940	Pubmed	FALSE	2023	Qin	Scanning the latent phases and superconductivity in the Nb-Pb system at high pressure.	Physical chemistry chemical physics : PCCP	Research on material and physics
37257447	Pubmed	FALSE	2023	Radenkovic	Tracer metabolomics reveals the role of aldose reductase in glycosylation.	Cell reports. Medicine	No immune involvement
36471112	Pubmed	FALSE	2023	Xiao	Mannose metabolism normalizes gut homeostasis by blocking the TNF-α-mediated proinflammatory circuit.	Cellular & molecular immunology	Basic Research
37457624	Pubmed	FALSE	2023	Finsterer	Strokelike Episodes in	Global medical genetics	Commentary on article
37224763	Pubmed	TRUE	2023	De Graef	Coagulation abnormalities in a prospective cohort of 50 patients with PMM2-congenital disorder of glycosylation.	Molecular genetics and metabolism
36743691	Pubmed	FALSE	2023	Yu	Cysteine Pathogenic Variants of PMM2 Are Sensitive to Environmental Stress with Loss of Structural Stability.	Oxidative medicine and cellular longevity	Basic Research (protein)
37367058	Pubmed	FALSE	2023	Mathew	Metabolic Deregulation in Pulmonary Hypertension.	Current issues in molecular biology	Basic Research
37232187	Pubmed	FALSE	2023	Han	Superconducting boron allotrope featuring pentagonal bipyramid at ambient pressure.	Physical chemistry chemical physics : PCCP	Research on material and physics
37428395	Pubmed	FALSE	2023	Ye	Exploring the glycolytic cross-talk genes between inflammatory bowel disease and colorectal cancer.	Functional & integrative genomics	Basic Research
36817047	Pubmed	FALSE	2023	Yang	Construction of cuproptosis‑associated prognostic signature in colon adenocarcinoma based on bioinformatics and RT‑qPCR analysis.	Oncology letters	Basic Research
36719165	Pubmed	FALSE	2023	Dang Do	Elevated oxysterol and N-palmitoyl-O-phosphocholineserine levels in congenital disorders of glycosylation.	Journal of inherited metabolic disease	Not PMM2-CDG

## Sheet: Genetic Analysis
Genetic variants (Va/Vb)	Raw Values	Percentage	Mutation Type			Single Genetic Variants	Raw Value	Percentage
V129M/R141H	1	1.1	Heterozygotic			V129M	2	1.1
R141H/F119L	25	28.1	Heterozygotic			R141H	52	28.9
24delC/V231M	1	1.1	Heterozygotic			24delC	2	1.1
ND	10	11.2				ND	14	7.7
N216I/N216I	1	1.1	Homozygotic			N216I	1	0.6
E93A/R141H	1	1.1	Heterozygotic			E93A	1	0.6
F119L/F157S	2	2.2	Heterozygotic			F119L	30	16.4	29 patients (one homozygotic case)
V231M/T237R	1	1.1	Heterozygotic			V231M	1	0.6
P113L/IVS3+2T>C	2	2.2	Heterozygotic			IVS3+2T>C	2	1.1
T237R/C241S	2	2.2	Heterozygotic			T237R	4	2.2
24delC/P113L	1	1.1	Heterozygotic			D188G	1	0.6
R141H/V139M	1	1.1	Heterozygotic			M1V	1	0.6
D188G/L35X	1	1.1	Heterozygotic			I132T	1	0.6
M1V/V129M	1	1.1	Heterozygotic			F157S	3	1.7
I132T/F207S	1	1.1	Heterozygotic			R21G	2	1.1
R141H/V231M	5	5.6	Heterozygotic			G57R	1	0.6
F157S/C241S	1	1.1	Heterozygotic			E33X	1	0.6
R21G/R21G	1	1.1	Homozygotic			Y64C	1	0.6
G57R/R141H	1	1.1	Heterozygotic			P113L	12	6.5	12 patients (one homozygotic case)
E33X/V44A	1	1.1	Heterozygotic			I153*	1	0.6
Y64C/R141H	1	1.1	Heterozygotic			L32R	2	1.1
P113L/haploinsufficiency	1	1.1	Heterozygotic			D65Y	1	0.6
P113L/T118S+P184D	1	1.1	Heterozygotic			L104V	3	1.7
R141H/G208A	1	1.1	Heterozygotic			p.L82Vfs*2	1	0.6
I153*/I122T	1	1.1	Heterozygotic			I132F	2	1.1
L32R/IVS-1G>C	1	1.1	Heterozygotic			p.C9AfsX27	1	0.6
P113L/F207S	1	1.1	Heterozygotic			D12H	1	0.6
D65Y/R141H	1	1.1	Heterozygotic			V44A	2	1.1
L104V/L104V	1	1.1	Homozygotic			G15R	1	0.6
L82Vfs*2/I132T	1	1.1	Heterozygotic			G42R	1	0.6
g.18313A > T in exon 5 with two effects: homozygoty for p.I132F/p.I132F and the frameshit mutation p.G117Rfs*4 responsible for the skipping of exon 5	1	1.1	Heterozygotic			G117C	1	0.6
F119L/F119L	1	1.1	Homozygotic			promoter variant in PMM2 (c.-167G > T) in trans	3	1.4
p.C9AfsX27/p.V129M	1	1.1	Heterozygotic			G15A	1	0.6
D12H/L104V	1	1.1	Heterozygotic			V231M	6	3.1
P113L/P113L	1	1.1	Homozygotic			N216I	2	1.1
V44A/R141H	1	1.1	Heterozygotic			C241S	3	1.5
G15R/R141H	1	1.1	Heterozygotic			V139M	1	0.6
G42R/P113L	1	1.1	Heterozygotic			L35X	1	0.6
R141H/L32R	1	1.1	Heterozygotic			F207S	2	1
G117C/I120T	1	1.1	Heterozygotic			haploinsufficiency	1	0.6
promoter variant in PMM2 (c.-167G > T) in trans with R141H	3	3.4	Heterozygotic			T118S	1	0.6
G15A/R141H	1	1.1	Heterozygotic			G208A	1	0.6
P113L/V182D	1	1.1	Heterozygotic			I122T	1	0.6
R141H/N216I	1	1.1	Heterozygotic			IVS-1G>C	1	0.6
P113L/T237R	1	1.1	Heterozygotic			p.I132T	1	0.6
R141H/P113L	1	1.1	Heterozygotic			p.V129M	1	0.6
F119L/ *	1	1.1	Heterozygotic			I120T	1	0.6
Total	89	98.9				V182D	1	0.6
						*	1	0.6
						p.G117Rfs*4 responsible for the skipping of exon 5	1	0.6
						P184D	1	0.6
							180	100.1
Legends
	Homozygotic Mutation
	Heterozygotic Mutation
